# Supplementary material for: Multi-tissue profiling of oxylipins reveal a conserved up-regulation of epoxide:diol ratio that associates with white adipose tissue inflammation and liver steatosis in obesity
Source: PubMed Central journal article supplement (PMC11061246; doi:10.1016/j.ebiom.2024.105127), 2024-04-26
Supplement: mmc2.pdf [file mmc2.pdf]

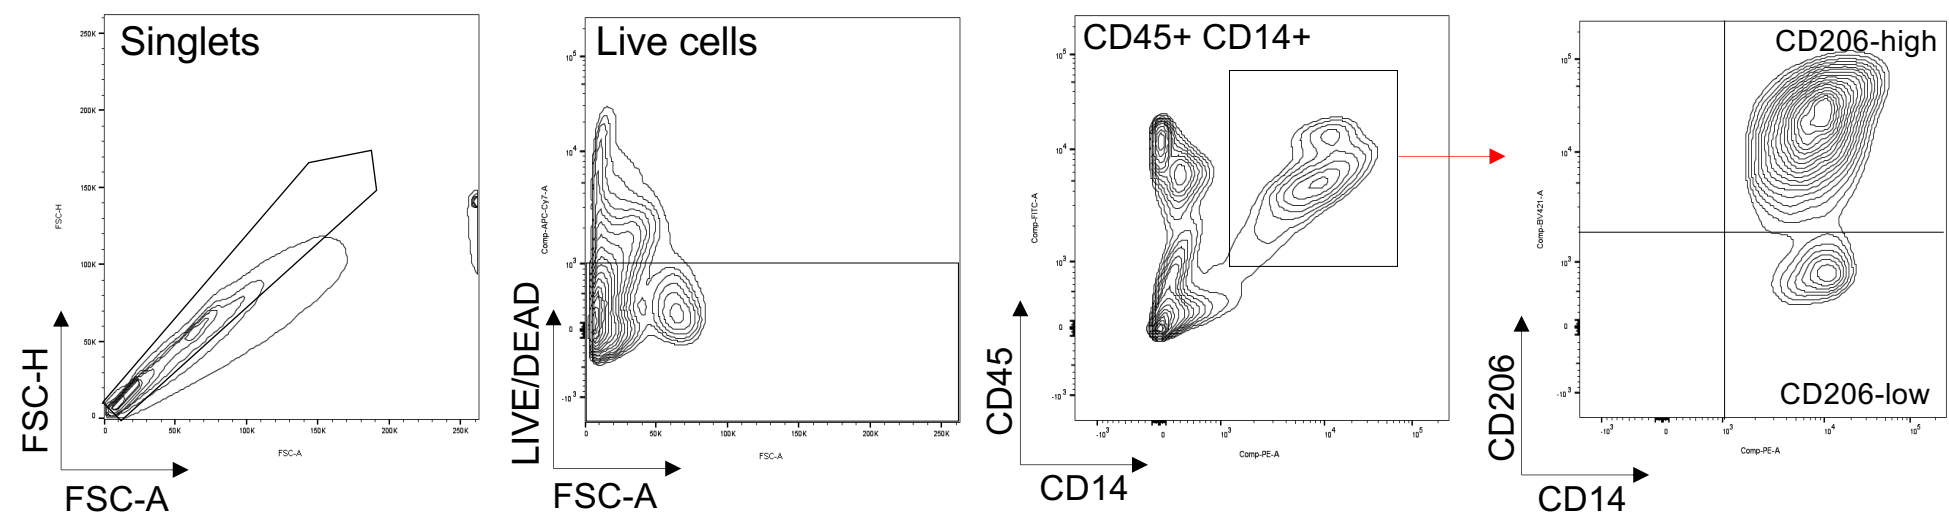

**Supplementary Figure 2.** Gating strategy for monocyte/macrophage markers in stromal vascular fraction (SVF) isolated from WAT of bariatric surgery patients; from left to right, the panels indicate (i) singlets, (ii) live cells, (iii) CD45+CD14+ cells, (iv) CD206+ cells. The red arrow indicates the direction of gating.
