# Supplementary material for: Multi-tissue profiling of oxylipins reveal a conserved up-regulation of epoxide:diol ratio that associates with white adipose tissue inflammation and liver steatosis in obesity
Source: PubMed Central journal article supplement (PMC11061246; doi:10.1016/j.ebiom.2024.105127), 2024-04-26
Supplement: mmc3.pdf [file mmc3.pdf]

a

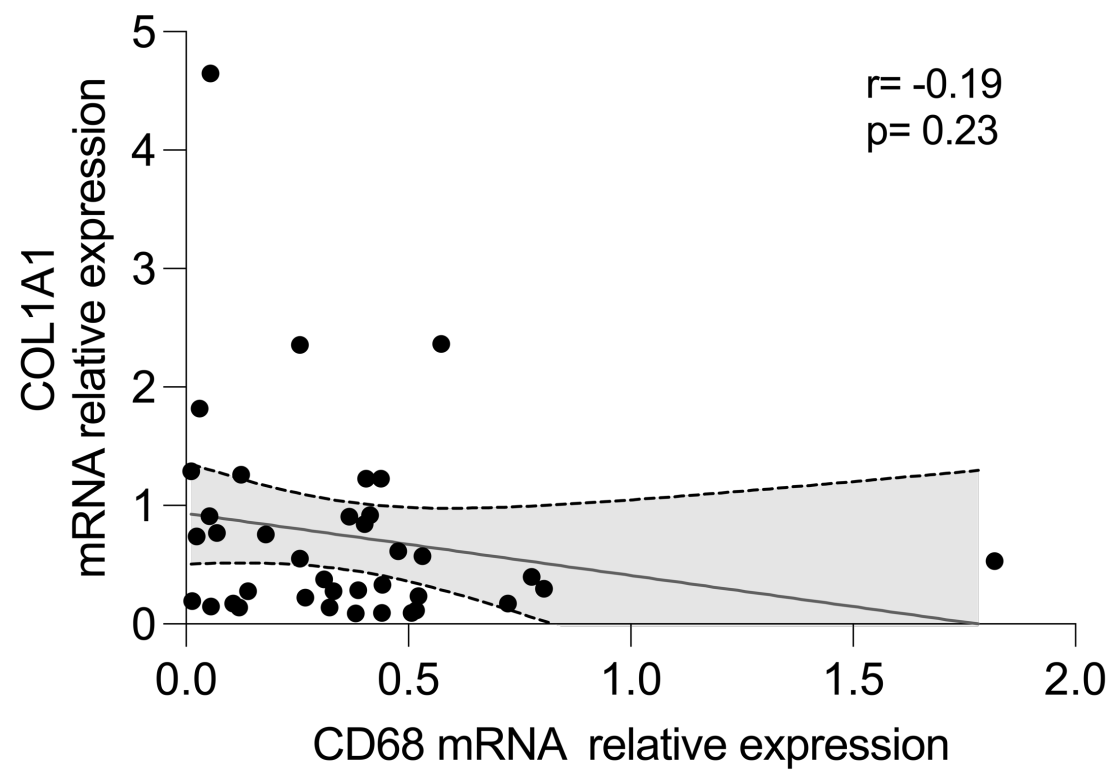

b

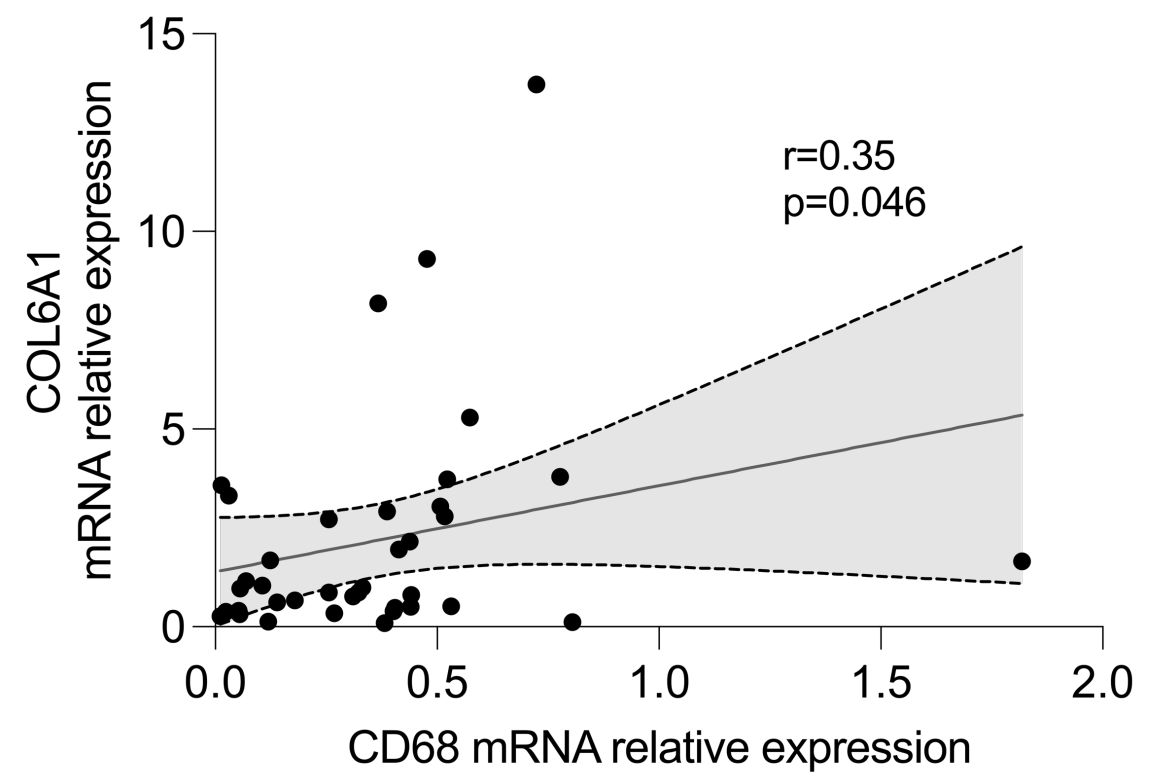

**Supplementary Figure 3. Macrophage infiltration and type I, type VI collagens in the WAT.** Correlation between COL1A1 (a) and COL6A1 (b) mRNA levels and CD68 mRNA levels. N=38; statistical significance was calculated using Spearman's correlation coefficient (A) and (B).
