# Supplementary material for: Multi-tissue profiling of oxylipins reveal a conserved up-regulation of epoxide:diol ratio that associates with white adipose tissue inflammation and liver steatosis in obesity
Source: PubMed Central journal article supplement (PMC11061246; doi:10.1016/j.ebiom.2024.105127), 2024-04-26
Supplement: mmc5.pdf [file mmc5.pdf]

**a**

| 5,6-DHET                                             | R     | R <sup>2</sup> | Beta  | t      | Sig.          |
|------------------------------------------------------|-------|----------------|-------|--------|---------------|
|                                                      | 0.541 | 0.292          |       |        |               |
| Age                                                  |       |                | 0.002 | 0.196  | 0.055         |
| Sex [Female=1 male=2]                                |       |                | 0.073 | 0.231  | 0.025         |
| Ethnicity [white=1 black =2 mixed=3 asian=4 other=5] |       |                | 0.015 | -0.136 | 0.175         |
| Obese[lean=1, obese=2]                               |       |                | 0.104 | -0.344 | <b>0.003*</b> |
| Total: 85                                            |       |                |       |        |               |

| 11,12-DHET                                           | R     | R <sup>2</sup> | Beta  | t      | Sig.         |
|------------------------------------------------------|-------|----------------|-------|--------|--------------|
|                                                      | 0.459 | 0.211          |       |        |              |
| Age                                                  |       |                | 0.002 | 0.113  | 0.291        |
| Sex [Female=1 male=2]                                |       |                | 0.063 | 0.294  | 0.007        |
| Ethnicity [white=1 black =2 mixed=3 asian=4 other=5] |       |                | 0.013 | -0.165 | 0.12         |
| Obese[lean=1, obese=2]                               |       |                | 0.09  | -0.232 | <b>0.05*</b> |
| Total: 85                                            |       |                |       |        |              |

| 10,11-DiHDPa                                         | R     | R <sup>2</sup> | Beta  | t      | Sig.          |
|------------------------------------------------------|-------|----------------|-------|--------|---------------|
|                                                      | 0.506 | 0.256          |       |        |               |
| Age                                                  |       |                | 0.002 | 0.208  | 0.062         |
| Sex [Female=1 male=2]                                |       |                | 0.079 | 0.018  | 0.873         |
| Ethnicity [white=1 black =2 mixed=3 asian=4 other=5] |       |                | 0.015 | -0.196 | 0.079         |
| Obese[lean=1, obese=2]                               |       |                | 0.106 | -0.402 | <b>0.002*</b> |
| Total: 85                                            |       |                |       |        |               |

| 12,13-EpOME:DiHOME                                   | R     | R <sup>2</sup> | Beta  | t      | Sig.          |
|------------------------------------------------------|-------|----------------|-------|--------|---------------|
|                                                      | 0.299 | 0.089          |       |        |               |
| Age                                                  |       |                | 0.002 | -0.047 | 0.684         |
| Sex [Female=1 male=2]                                |       |                | 0.067 | 0.013  | 0.912         |
| Ethnicity [white=1 black =2 mixed=3 asian=4 other=5] |       |                | 0.013 | 0.082  | 0.468         |
| Obese[lean=1, obese=2]                               |       |                | 0.096 | 0.295  | <b>0.021*</b> |
| Total: 85                                            |       |                |       |        |               |

**b**

| 5,6-DHET                                             | R     | R <sup>2</sup> | Beta  | t      | Sig.  |
|------------------------------------------------------|-------|----------------|-------|--------|-------|
|                                                      | 0.341 | 0.116          |       |        |       |
| Age                                                  |       |                | 0.002 | 0.035  | 0.764 |
| Sex [Female=1 male=2]                                |       |                | 0.071 | -0.153 | 0.199 |
| Ethnicity [white=1 black =2 mixed=3 asian=4 other=5] |       |                | 0.014 | 0.043  | 0.704 |
| Fasted [Fasted=1 non-Fasted=2]                       |       |                | 0.059 | 0.246  | 0.055 |
| Obese[lean=1, obese=2]                               |       |                | 0.099 | -0.152 | 0.285 |
| Total: 82                                            |       |                |       |        |       |

| 11,12-DHET                                           | R     | R <sup>2</sup> | Beta  | t      | Sig.  |
|------------------------------------------------------|-------|----------------|-------|--------|-------|
|                                                      | 0.435 | 0.19           |       |        |       |
| Age                                                  |       |                | 0.001 | 0.047  | 0.671 |
| Sex [Female=1 male=2]                                |       |                | 0.049 | -0.177 | 0.122 |
| Ethnicity [white=1 black =2 mixed=3 asian=4 other=5] |       |                | 0.01  | 0.004  | 0.969 |
| Fasted [Fasted=1 non-Fasted=2]                       |       |                | 0.041 | 0.285  | 0.021 |
| Obese[lean=1, obese=2]                               |       |                | 0.069 | -0.234 | 0.086 |
| Total: 82                                            |       |                |       |        |       |

| 10,11-DiHDPa                                         | R     | R <sup>2</sup> | Beta  | t      | Sig.          |
|------------------------------------------------------|-------|----------------|-------|--------|---------------|
|                                                      | 0.523 | 0.274          |       |        |               |
| Age                                                  |       |                | 0.002 | 0.282  | 0.01          |
| Sex [Female=1 male=2]                                |       |                | 0.08  | -0.228 | 0.039         |
| Ethnicity [white=1 black =2 mixed=3 asian=4 other=5] |       |                | 0.016 | -0.076 | 0.464         |
| Fasted [Fasted=1 non-Fasted=2]                       |       |                | 0.068 | 0.07   | 0.551         |
| Obese[lean=1, obese=2]                               |       |                | 0.112 | -0.34  | <b>0.011*</b> |
| Total: 82                                            |       |                |       |        |               |

| 12,13-EpOME:DiHOME                                   | R     | R <sup>2</sup> | Beta  | t      | Sig.         |
|------------------------------------------------------|-------|----------------|-------|--------|--------------|
|                                                      | 0.466 | 0.217          |       |        |              |
| Age                                                  |       |                | 0.002 | 0.003  | 0.98         |
| Sex [Female=1 male=2]                                |       |                | 0.089 | 0.199  | 0.077        |
| Ethnicity [white=1 black =2 mixed=3 asian=4 other=5] |       |                | 0.018 | 0.036  | 0.732        |
| Fasted [Fasted=1 non-Fasted=2]                       |       |                | 0.074 | -0.289 | 0.018        |
| Obese[lean=1, obese=2]                               |       |                | 0.124 | 0.293  | <b>0.03*</b> |
| Total: 82                                            |       |                |       |        |              |

**Supplementary Figure 5. Multivariate analysis of CYP-derived diols conserved between WAT and plasma.** Linear regression tables for CYP-derived diols and 12,13-EpOME:diHOME measured in WAT (**a**) and plasma (**b**), adjusted for age, sex and ethnicity; N=85 for WAT; N=82 for plasma. Statistical significance was calculated using a linear regression model with normalization of dependent variable by log transformation of the metabolite.
