# Supplementary material for: Multi-tissue profiling of oxylipins reveal a conserved up-regulation of epoxide:diol ratio that associates with white adipose tissue inflammation and liver steatosis in obesity
Source: PubMed Central journal article supplement (PMC11061246; doi:10.1016/j.ebiom.2024.105127), 2024-04-26
Supplement: mmc7.pdf [file mmc7.pdf]

**a**

| Liver 14,15-EET:DHET (free)                             | R     | R <sup>2</sup> | Beta  | t      | Sig.          |
|---------------------------------------------------------|-------|----------------|-------|--------|---------------|
|                                                         | 0.551 | 0.303          |       |        |               |
| Sex [Female=1 male=2]                                   |       |                | 0.066 | -0.014 | 0.932         |
| Age                                                     |       |                | 0.002 | -0.173 | 0.347         |
| Ethnicity [white=1 black =2 mixed=3<br>asian=4 other=5] |       |                | 0.017 | 0.329  | 0.053         |
| T2DM [y=1 n=2]                                          |       |                | 0.062 | -0.483 | <b>0.009*</b> |
| Total 31                                                |       |                |       |        |               |

**b**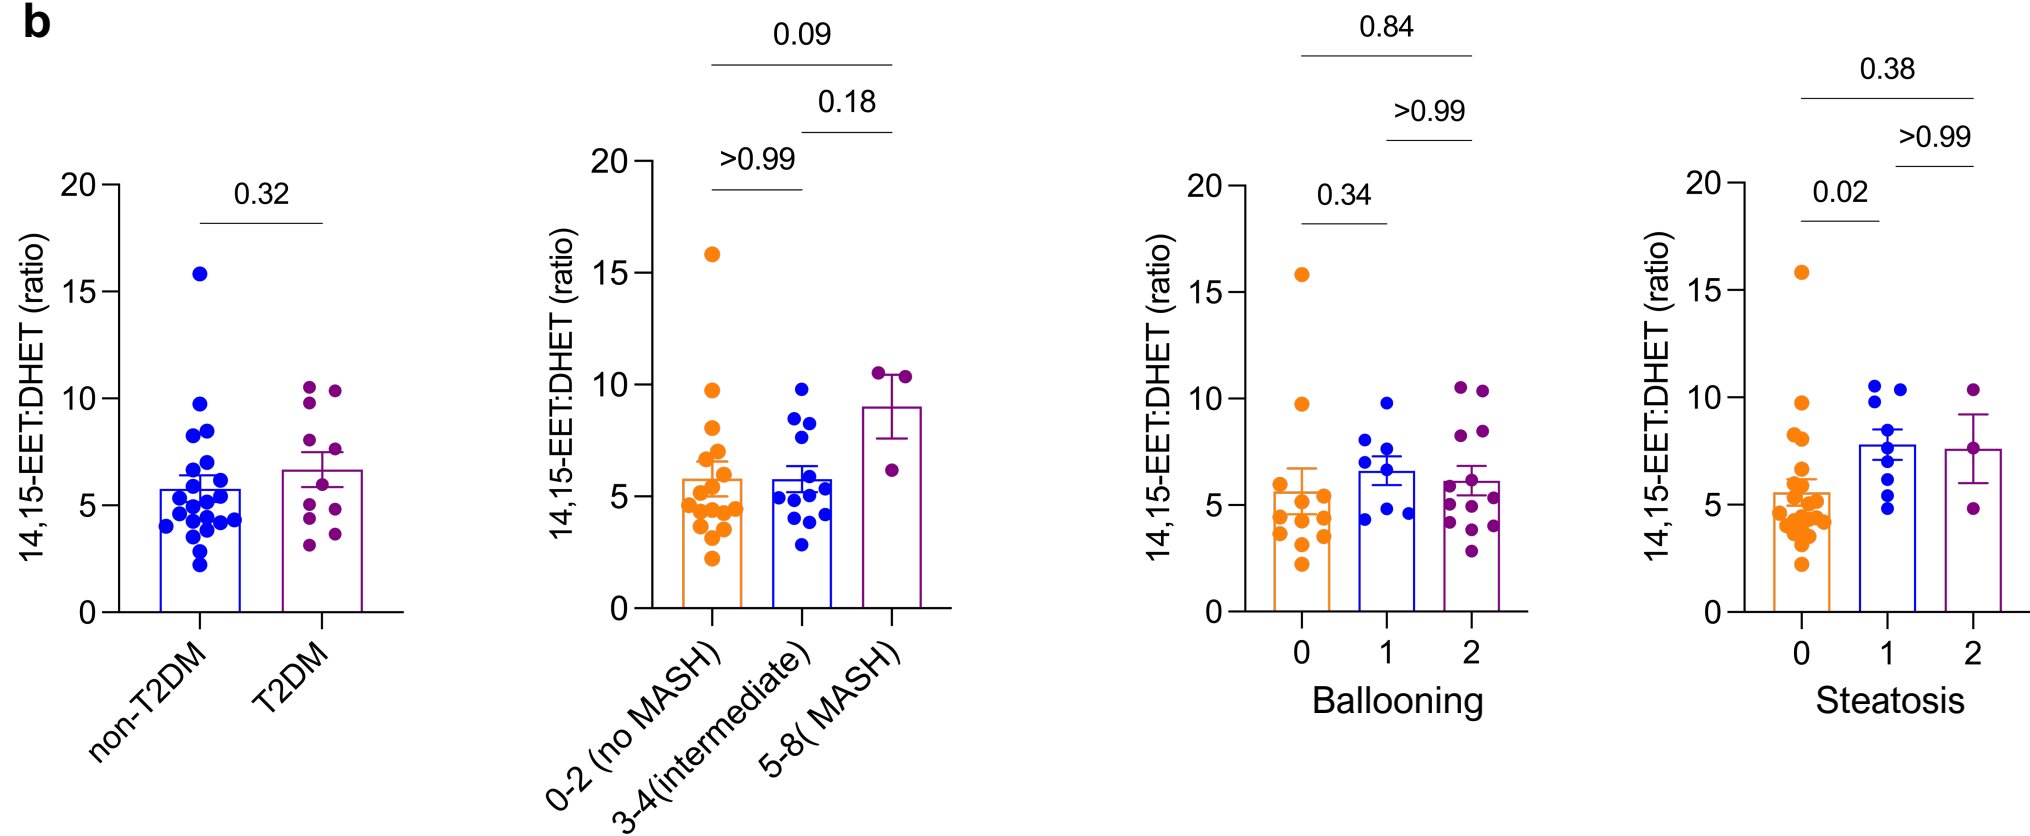**c**

| Liver 14,15-EET:DHET (total)                            | R    | R <sup>2</sup> | Beta  | t      | Sig.  |
|---------------------------------------------------------|------|----------------|-------|--------|-------|
|                                                         | 0.45 | 0.202          |       |        |       |
| Sex [Female=1 male=2]                                   |      |                | 1.156 | -0.228 | 0.209 |
| Age                                                     |      |                | 0.04  | -0.002 | 0.994 |
| Ethnicity [white=1 black =2<br>mixed=3 asian=4 other=5] |      |                | 0.299 | 0.395  | 0.032 |
| T2DM [y=1 n=2]                                          |      |                | 1.093 | -0.199 | 0.29  |
| Total 31                                                |      |                |       |        |       |

**Supplementary Figure 7. Multivariate analysis for hepatic 14,15-EET:DHET based on free (unesterified) and total epoxide:diol. (a)** Linear regression table for free 14,15-EET:DHET measured in liver adjusted for age, sex and ethnicity; N=31. **(b)** T2DM and MASLD phenotypes for total 14,15-EET:DHET. **(c)** Linear regression table for total 14,15-EET:DHET measured in liver adjusted for age, sex and ethnicity; N=31. Statistical significance was calculated using a linear regression model with normalization of dependent variable by log transformation of the metabolite **(a)** and **(c)** and Mann-Whitney test or Kruskal-Wallis test with Dunn's multiple comparisons test **(b)**.
