# Supplementary material for: Multi-tissue profiling of oxylipins reveal a conserved up-regulation of epoxide:diol ratio that associates with white adipose tissue inflammation and liver steatosis in obesity
Source: PubMed Central journal article supplement (PMC11061246; doi:10.1016/j.ebiom.2024.105127), 2024-04-26
Supplement: mmc8.pdf [file mmc8.pdf]

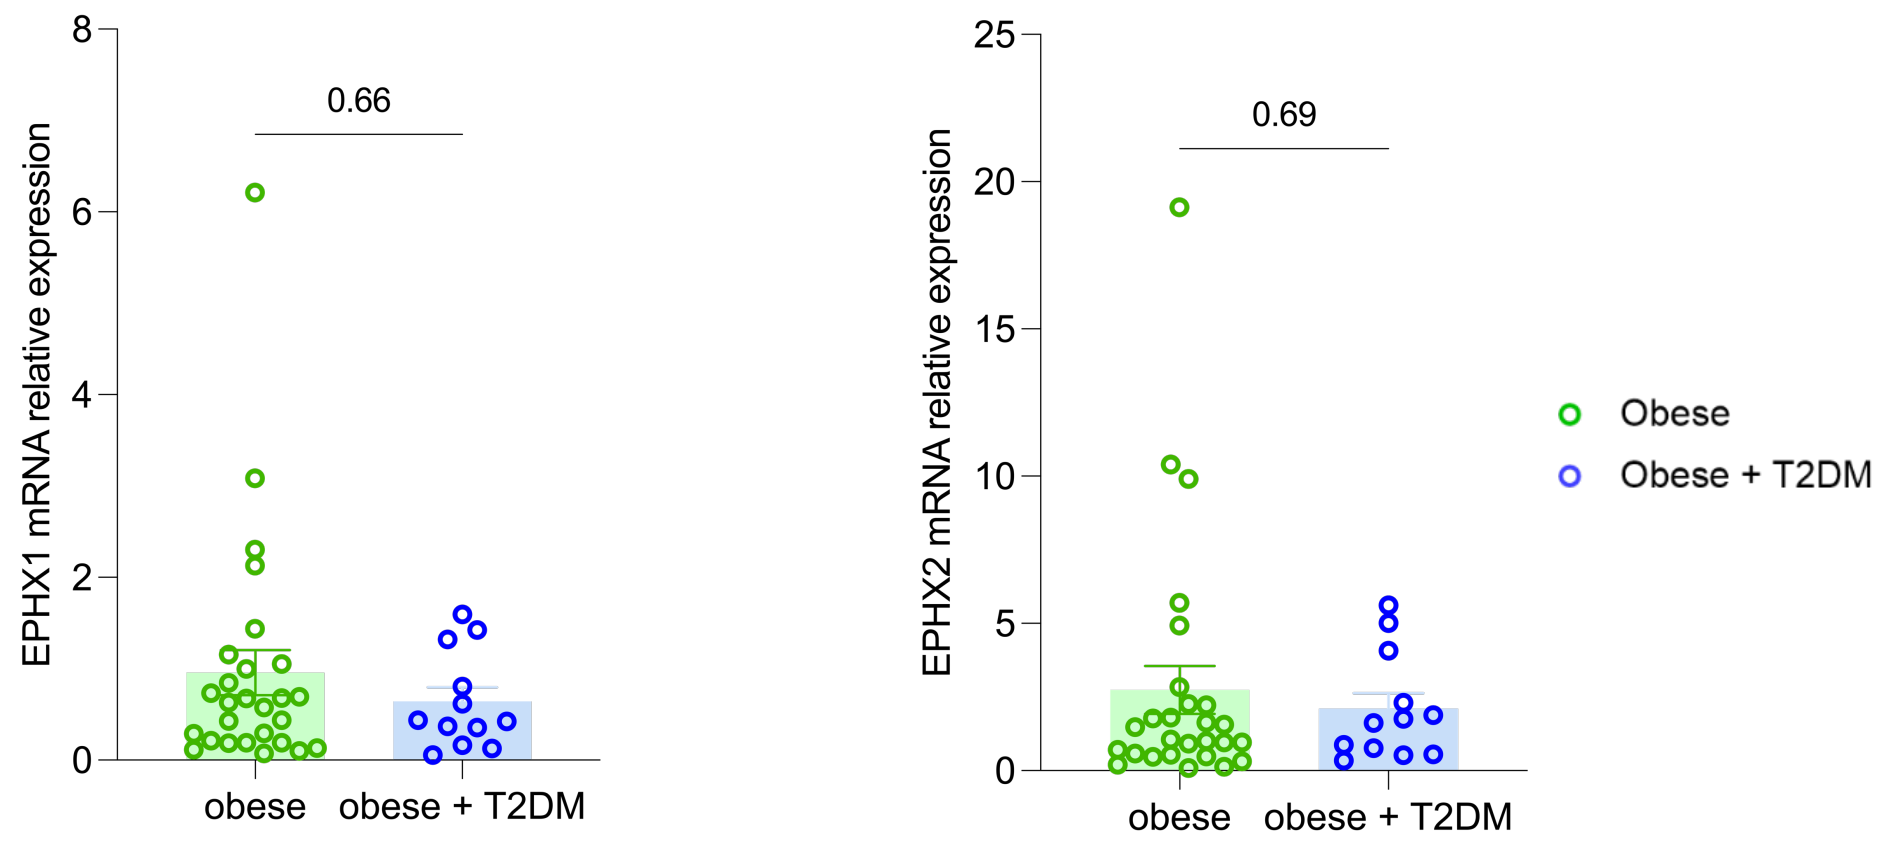

Supplementary Figure 8. Hepatic *EPHX1* and *EPHX2* expression in obese patients with and without T2DM. *EPHX1* and *EPHX2* in the liver of obese (N=27) and obese patients with T2DM (N=12). Statistical significance measured by Mann-Whitney test.
