# Supplementary material for: Multi-tissue profiling of oxylipins reveal a conserved up-regulation of epoxide:diol ratio that associates with white adipose tissue inflammation and liver steatosis in obesity
Source: PubMed Central journal article supplement (PMC11061246; doi:10.1016/j.ebiom.2024.105127), 2024-04-26
Supplement: mmc9.pdf [file mmc9.pdf]

| <b>10,11-EpDPA:DiHDPA</b>                            | R     | R <sup>2</sup> | Beta   | t      | Sig.          |
|------------------------------------------------------|-------|----------------|--------|--------|---------------|
|                                                      | 0.676 | 0.457          |        |        |               |
| Sex [Female=1 male=2]                                |       |                | -0.029 | -0.178 | 0.86          |
| Age                                                  |       |                | -0.087 | -0.49  | 0.629         |
| Ethnicity [white=1 black =2 mixed=3 asian=4 other=5] |       |                | 0.148  | 0.874  | 0.391         |
| CPA (%)                                              |       |                | -0.135 | -0.818 | 0.421         |
| Fat (%)                                              |       |                | 0.444  | 2.729  | <b>0.012*</b> |
| Ballooning (%)                                       |       |                | 0.438  | 2.47   | <b>0.021*</b> |
| Inflammation (%)                                     |       |                | 0.157  | 0.915  | 0.369         |
| Total 31                                             |       |                |        |        |               |

| <b>11,12-EET:DHET</b>                                | R     | R <sup>2</sup> | Beta   | t      | Sig.          |
|------------------------------------------------------|-------|----------------|--------|--------|---------------|
|                                                      | 0.674 | 0.454          |        |        |               |
| Sex [Female=1 male=2]                                |       |                | -0.044 | -0.266 | 0.793         |
| Age                                                  |       |                | 0.099  | 0.557  | 0.582         |
| Ethnicity [white=1 black =2 mixed=3 asian=4 other=5] |       |                | 0.219  | 1.29   | 0.209         |
| CPA (%)                                              |       |                | 0.116  | 0.701  | 0.49          |
| Fat (%)                                              |       |                | 0.506  | 3.102  | <b>0.005*</b> |
| Ballooning (%)                                       |       |                | 0.424  | 2.384  | <b>0.025*</b> |
| Inflammation (%)                                     |       |                | 0.267  | 1.555  | 0.133         |
| Total 31                                             |       |                |        |        |               |

| <b>14,15-EET:DHET</b>                                | R     | R <sup>2</sup> | Beta   | t      | Sig.          |
|------------------------------------------------------|-------|----------------|--------|--------|---------------|
|                                                      | 0.678 | 0.46           |        |        |               |
| Sex [Female=1 male=2]                                |       |                | -0.042 | -0.259 | 0.798         |
| Age                                                  |       |                | 0.065  | 0.37   | 0.715         |
| Ethnicity [white=1 black =2 mixed=3 asian=4 other=5] |       |                | 0.109  | 0.644  | 0.526         |
| CPA (%)                                              |       |                | -0.078 | -0.472 | 0.641         |
| Fat (%)                                              |       |                | 0.523  | 3.222  | <b>0.004*</b> |
| Ballooning (%)                                       |       |                | 0.466  | 2.636  | <b>0.014*</b> |
| Inflammation (%)                                     |       |                | 0.066  | 0.385  | 0.704         |
| Total 31                                             |       |                |        |        |               |

| <b>12,13-EpOME:DiHOME</b>                            | R    | R <sup>2</sup> | Beta  | t      | Sig.          |
|------------------------------------------------------|------|----------------|-------|--------|---------------|
|                                                      | 0.61 | 0.372          |       |        |               |
| Sex [Female=1 male=2]                                |      |                | -0.08 | -0.454 | 0.654         |
| Age                                                  |      |                | 0.017 | 0.091  | 0.928         |
| Ethnicity [white=1 black =2 mixed=3 asian=4 other=5] |      |                | 0.233 | 1.28   | 0.213         |
| CPA (%)                                              |      |                | 0.293 | 1.647  | 0.112         |
| Fat (%)                                              |      |                | 0.444 | 2.539  | <b>0.018*</b> |
| Ballooning (%)                                       |      |                | 0.263 | 1.381  | 0.18          |
| Inflammation (%)                                     |      |                | 0.172 | 0.937  | 0.358         |
| Total 31                                             |      |                |       |        |               |

| <b>19,20-EpDPE:DiHDPA</b>                            | R     | R <sup>2</sup> | Beta   | t      | Sig.  |
|------------------------------------------------------|-------|----------------|--------|--------|-------|
|                                                      | 0.519 | 0.27           |        |        |       |
| Sex [Female=1 male=2]                                |       |                | -0.184 | -0.969 | 0.342 |
| Age                                                  |       |                | -0.331 | -1.615 | 0.119 |
| Ethnicity [white=1 black =2 mixed=3 asian=4 other=5] |       |                | -0.115 | -0.583 | 0.565 |
| CPA (%)                                              |       |                | 0.164  | 0.856  | 0.4   |
| Fat (%)                                              |       |                | 0.095  | 0.505  | 0.618 |
| Ballooning (%)                                       |       |                | 0.107  | 0.523  | 0.606 |
| Inflammation (%)                                     |       |                | 0.284  | 1.43   | 0.166 |
| Total 31                                             |       |                |        |        |       |

| <b>17,18-EpETE:DiHETE</b>                            | R     | R <sup>2</sup> | Beta  | t     | Sig.  |
|------------------------------------------------------|-------|----------------|-------|-------|-------|
|                                                      | 0.471 | 0.222          |       |       |       |
| Sex [Female=1 male=2]                                |       |                | 0.243 | 1.242 | 0.226 |
| Age                                                  |       |                | 0.309 | 1.458 | 0.158 |
| Ethnicity [white=1 black =2 mixed=3 asian=4 other=5] |       |                | 0.166 | 0.82  | 0.421 |
| CPA (%)                                              |       |                | 0.026 | 0.13  | 0.897 |
| Fat (%)                                              |       |                | 0.085 | 0.434 | 0.668 |
| Ballooning (%)                                       |       |                | 0.292 | 1.378 | 0.181 |
| Inflammation (%)                                     |       |                | 0.296 | 1.444 | 0.162 |
| Total 31                                             |       |                |       |       |       |

**Supplementary Figure 9. Multivariate analysis of different epoxide:diol measured in MASLD liver biopsies of bariatric surgery patients.** Linear regression tables for 10,11-EpDPA:DiHDPA, 11,12-EET:DHET, 14,15-EET:DHET, 12,13-EpOME:DiHOME, 19,20-EpDPE:DiHDPA, 17,18-EpETE:DiHETE in MASLD liver tissue adjusted for confounding factors (age, gender and ethnicity; N=31). Markers of MASLD were measured by AI which calculated percentage of CPA, ballooning, steatosis and inflammation in individual liver samples (see methods). Statistical significance was calculated using a linear regression model with normalization of dependent variable by log transformation of metabolite activity.
