# Supplementary material for: Multi-tissue profiling of oxylipins reveal a conserved up-regulation of epoxide:diol ratio that associates with white adipose tissue inflammation and liver steatosis in obesity
Source: PubMed Central journal article supplement (PMC11061246; doi:10.1016/j.ebiom.2024.105127), 2024-04-26
Supplement: mmc11.pdf [file mmc11.pdf]

| <b>Human gene</b> | <b>Forward Primer (5'- 3')</b> | <b>Reverse Primer (3'-5')</b> |
|-------------------|--------------------------------|-------------------------------|
| COL1A1            | TCCGACCTCTCTCCTCTGAA           | GTCTTTTGTTCCTCCCACC           |
| COL6A1            | CGCTTCATCGACAACCTGAG           | TCCAGCCCCTTCTTGATAGC          |
| CD68              | CCTCCAAGCCCAGATTGAGA           | CATTGTA CTCCACCGCCATG         |
| TREM2             | TGCGGAATCTACAACCCAT            | GCATCCTCGAAGCTCTCAGA          |
| ALOX5             | ATGCCAACAAAACAGACCCC           | TGGAACGCACCCAGATTTTG          |
| ALOX12            | TCTCCAACCCCAACTGTT             | GGAACCTGAAGATGGGGTGC          |
| ALOX15            | CTGCAACTGGATCTCTGTGC           | TCTTCCAGCTCTTCTTCCCG          |
| CYP2S1            | TGGGCATGGACAGGGTTAAT           | GTTGCTTTGTGGCCCTTGTA          |
| CYP2J2            | GGAGAACGGACAGCCTTTTG           | AGCTGGCATGTCTTTGAAGC          |
| CYP2C8            | TGACCCTGGCCACTTTCTAG           | ATGAGGGTGGCAGAGAAACA          |
| CYP2C9            | GGGGCAGCTCTAACCTCTAG           | CTGGGAGGCGGAGGTTATAG          |
| EPHX1             | ATGACTCTCCTGTGGGTCTG           | GAGGAGATGATGGTGCCTGT          |
| EPHX2             | GAAAGATCAACCGCCCCATG           | CCCACCTGACACGACTCTAT          |
| ACTIN             | ATGTGGATCAGCAAGCAGGA           | CAATCAAAGTCCTCGGCCAC          |
| HRPT              | TGAGGATTTGGAAAGGGTGT           | AATCCAGCAGGTCAGCAAAG          |

**Supplementary Table 1.** Human primer sequences used in for qRT-PCR
