# Supplementary material for: Multi-tissue profiling of oxylipins reveal a conserved up-regulation of epoxide:diol ratio that associates with white adipose tissue inflammation and liver steatosis in obesity
Source: PubMed Central journal article supplement (PMC11061246; doi:10.1016/j.ebiom.2024.105127), 2024-04-26
Supplement: mmc12.pdf [file mmc12.pdf]

| Compound                                                | Compound (abbreviation) | MS1 (m/z) | MS2 (m/z) | RT (min) | Low Standard (pg/ul) | High Standard (pg/ul) | ISTD used      | r <sup>2</sup> | Adipose S/N | Liver S/N |
|---------------------------------------------------------|-------------------------|-----------|-----------|----------|----------------------|-----------------------|----------------|----------------|-------------|-----------|
| 6-Keto-prostaglandin F1alpha                            | 6-keto-PGF1a            | 369.2     | 163.1     | 2.39     | 0.1                  | 120                   | PGE2-d9        | 0.998          | 1864        | 76        |
| Thromboxane B2                                          | TXB2                    | 369.2     | 169.2     | 3.21     | 0.025                | 30                    | PGE2-d9        | 0.997          | 44          | 83        |
| Prostaglandin B2                                        | PGB2                    | 333.2     | 175.2     | 5.21     | 0.1                  | 120                   | PGE2-d9        | 0.996          | 48          | 42        |
| Prostaglandin D2                                        | PGD2                    | 351.2     | 271.1     | 3.96     | 0.025                | 30                    | PGE2-d9        | 0.969          | 1025        | 519       |
| Prostaglandin E2                                        | PGE2                    | 351.2     | 271.1     | 3.75     | 0.025                | 30                    | PGE2-d9        | 0.994          | 701         | 356       |
| 8-iso-prostaglandin F2 alpha                            | 8-iso-PGF2a             | 353.2     | 193.1     | 3.21     | 0.05                 | 60                    | PGE2-d9        | 0.995          | 45          | BD        |
| Prostaglandin F2alpha                                   | PGF2a                   | 353.2     | 193.1     | 3.65     | 0.05                 | 60                    | PGE2-d9        | 0.996          | 47          | 69        |
| Prostaglandin D3                                        | PGD3                    | 349.2     | 269.2     | 3.31     | 0.025                | 30                    | PGE2-d9        | 0.951          | BD          | 57        |
| Prostaglandin E3                                        | PGE3                    | 349.2     | 269.2     | 3.16     | 0.025                | 30                    | PGE2-d9        | 0.99           | BD          | 47        |
| 11-dehydrothromboxane B2                                | 11-dehydro-TXB2         | 367.2     | 161.3     | 3.73     | 0.025                | 30                    | PGE2-d9        | 0.967          | BD          | 158       |
| 15-keto Prostaglandin E2                                | 15-ketoPGE2             | 349.2     | 113.1     | 4.8      | 0.025                | 30                    | PGE2-d9        | 0.97           | BD          | BD        |
| 15-Keto Prostaglandin F2alpha                           | 15-keto-PGF2a           | 351.2     | 219.2     | 3.85     | 0.025                | 30                    | PGE2-d9        | 0.998          | BD          | BD        |
| 19,20-dihydroxy-4Z,7Z,10Z,13Z,19Z-docosapentaenoic acid | 19,20-DiHDPDA           | 361.2     | 273.2     | 6.77     | 0.1                  | 120                   | 11,12-DHET-d11 | 0.998          | 14          | 143       |
| 16,17-dihydroxy-4Z,7Z,10Z,13Z,19Z-docosapentaenoic acid | 16,17-DiHDPDA           | 361.2     | 233.1     | 7.06     | 0.1                  | 120                   | 11,12-DHET-d11 | 0.998          | 16          | 1296      |
| 13,14-dihydroxy-4Z,7Z,10Z,16Z,19Z-docosapentaenoic acid | 13,14-DiHDPDA           | 361.2     | 193.1     | 7.18     | 0.1                  | 120                   | 11,12-DHET-d11 | 0.998          | 32          | 1477      |
| 10,11-dihydroxy-4Z,7Z,13Z,16Z,19Z-docosapentaenoic acid | 10,11-DiHDPDA           | 361.2     | 153.1     | 7.35     | 0.1                  | 120                   | 11,12-DHET-d11 | 0.996          | 18          | 1928      |
| 7,8-dihydroxy-4Z,10Z,13Z,16Z,19Z-docosapentaenoic acid  | 7,8-DiHDPDA             | 361.2     | 189.1     | 7.75     | 0.1                  | 120                   | 11,12-DHET-d11 | 0.998          | BD          | 170       |
| 7,18-dihydroxy-5Z,8Z,11Z,14Z-eicosatetraenoic acid      | 17,18-DiHETE            | 335.2     | 247.1     | 5.89     | 0.1                  | 120                   | 11,12-DHET-d11 | 0.999          | 24          | 1338      |
| 14,15-dihydroxy-5Z,8Z,11Z,17Z-eicosatetraenoic acid     | 14,15-DiHETE            | 335.2     | 207.1     | 6.13     | 0.1                  | 120                   | 11,12-DHET-d11 | 0.999          | 22          | 710       |
| 11,12-dihydroxy-5Z,8Z,14Z-eicosatrienoic acid           | 11,12-DiHETE            | 335.2     | 167.1     | 6.23     | 0.1                  | 120                   | 11,12-DHET-d11 | 0.978          | BD          | 572       |
| 12,13-dihydroxy-9Z-octadecenoic acid                    | 12,13-DiHOME            | 313.2     | 183.2     | 6.29     | 1                    | 1200                  | 11,12-DHET-d11 | 0.987          | 749         | 3435      |
| 9,10-dihydroxy-12Z-octadecenoic acid                    | 9,10-DiHOME             | 313.2     | 201.1     | 6.5      | 1                    | 1200                  | 11,12-DHET-d11 | 0.97           | 3230        | 11700     |
| 14,15-dihydroxy-5Z,8Z,11Z-eicosatrienoic acid           | 14,15-DHET              | 337.2     | 207.2     | 6.75     | 0.1                  | 120                   | 11,12-DHET-d11 | 0.997          | 31          | 9736      |
| 11,12-dihydroxy-5Z,8Z,14Z-eicosatrienoic acid           | 11,12-DHET              | 337.2     | 167.2     | 7.09     | 0.1                  | 120                   | 11,12-DHET-d11 | 0.997          | 138         | 4927      |
| 8,9-dihydroxy-8Z,11Z,14Z-eicosatrienoic acid            | 8,9-DHET                | 337.2     | 127.3     | 7.4      | 0.1                  | 120                   | 11,12-DHET-d11 | 0.997          | 29          | 1019      |
| 5,6-dihydroxy-8Z,11Z,14Z-eicosatrienoic acid            | 5,6-DHET                | 337.2     | 145.1     | 7.84     | 0.1                  | 120                   | 11,12-DHET-d11 | 0.998          | 84          | 8540      |
| 19,20-epoxy-4Z,7Z,10Z,13Z,16Z-docosapentaenoic acid     | 19,20-EpDPE             | 343.2     | 281.1     | 10.34    | 0.2                  | 240                   | 11,12-EET-d11  | 0.998          | 53          | 160       |
| 16,17-epoxy-4Z,7Z,10Z,13Z,19Z-docosapentaenoic acid     | 16,17-EpDPE             | 343.2     | 233.1     | 10.78    | 0.2                  | 240                   | 11,12-EET-d11  | 0.998          | BD          | 21        |
| 13,14-epoxy-4Z,7Z,10Z,16Z,19Z-docosapentaenoic acid     | 13,14-EpDPE             | 343.2     | 193.1     | 10.89    | 0.2                  | 240                   | 11,12-EET-d11  | 0.998          | BD          | 54        |
| 10,11-epoxy-4Z,7Z,13Z,16Z,19Z-docosapentaenoic acid     | 10,11-EpDPE             | 343.2     | 153       | 10.98    | 0.2                  | 240                   | 11,12-EET-d11  | 0.997          | BD          | 936       |
| 7,8-epoxy-4Z,10Z,13Z,16Z,19Z-docosapentaenoic acid      | 7,8-EpDPE               | 343.2     | 189.1     | 11.17    | 0.2                  | 240                   | 11,12-EET-d11  | 0.997          | BD          | 205       |
| 17,18-epoxy-5Z,8Z,11Z,14Z-eicosatetraenoic acid         | 17,18-EpETE             | 317.2     | 259.1     | 8.94     | 0.1                  | 120                   | 11,12-EET-d11  | 0.998          | BD          | 33        |
| 14,15-epoxy-5Z,8Z,11Z,17Z-eicosatetraenoic acid         | 14,15-EpETE             | 317.2     | 207.1     | 9.42     | 0.2                  | 240                   | 11,12-EET-d11  | 0.998          | BD          | 110       |
| 11,12-epoxy-5Z,8Z,14Z,17Z-eicosatetraenoic acid         | 11,12-EpETE             | 317.2     | 167.1     | 9.5      | 0.2                  | 240                   | 11,12-EET-d11  | 0.978          | BD          | 45        |
| 12,13-epoxy-9Z-octadecenoic acid                        | 12,13-EpOME             | 295.2     | 195.2     | 10.34    | 0.5                  | 600                   | 11,12-EET-d11  | 0.984          | 1568        | 1695      |
| 9,10-epoxy-12Z-octadecenoic acid                        | 9,10-EpOME              | 295.2     | 277.3     | 10.54    | 0.5                  | 600                   | 11,12-EET-d11  | 0.991          | 418         | 457       |
| 14,15-epoxy-5Z,8Z,14Z-eicosatrienoic acid               | 14,15-EET               | 319.2     | 219.3     | 10.52    | 0.2                  | 240                   | 11,12-EET-d11  | 0.998          | 73          | 262       |
| 11,12-epoxy-5Z,8Z,14Z-eicosatrienoic acid               | 11,12-EET               | 319.2     | 179.2     | 10.9     | 0.2                  | 240                   | 11,12-EET-d11  | 0.997          | 71          | 129       |
| 8,9-epoxy-5Z,11Z,14Z-eicosatrienoic acid                | 8,9-EET                 | 319.2     | 151.1     | 11       | 0.2                  | 240                   | 11,12-EET-d11  | 0.996          | 22          | 81        |
| 5,6-epoxy-8Z,11Z,14Z-eicosatrienoic acid                | 5,6-EET                 | 319.2     | 191.3     | 11.17    | 0.2                  | 240                   | 11,12-EET-d11  | NA             | BD          | 127       |
| 20-hydroxydocosa-4Z,7Z,10Z,13Z,16Z,18Z-hexaenoic acid   | 22-HdOHE                | 343.2     | 269.1     | 8.07     | 0.025                | 30                    | d8-15-HETE     | 0.997          | BD          | 249       |
| 17-hydroxy-4Z,7Z,10Z,13Z,15E,19Z-docosahexaenoic acid,  | 17-HDHA                 | 343.2     | 281.2     | 9.04     | 0.025                | 30                    | d8-15-HETE     | 0.999          | 1872        | 197       |
| 12-hydroxy-5Z,8Z,10E,14Z,17Z-eicosapentaenoic acid      | 20-HEPE                 | 317.2     | 243.2     | 7.08     | 0.025                | 30                    | d8-15-HETE     | 0.998          | BD          | 27        |
| 18-hydroxyeicosa-5Z,8Z,11E,14Z,16E-pentaenoic acid      | 18-HEPE                 | 317.2     | 161.4     | 7.27     | 0.025                | 30                    | d8-15-HETE     | 0.998          | BD          | 28        |
| 13-hydroxy-9E,11E-octadecadienoic acid                  | 13-HODE                 | 295.2     | 195.2     | 8.47     | 2.5                  | 3000                  | d8-15-HETE     | 0.967          | 63600       | 7140      |
| 9-hydroxy-10E,12Z-octadecadienoic acid                  | 9-HODE                  | 295.2     | 171.2     | 8.59     | 2.5                  | 3000                  | d8-15-HETE     | 0.974          | 11700       | 15700     |
| 20-hydroxy-5Z,8Z,11Z,14Z-eicosatetraenoic acid          | 20-HETE                 | 319.2     | 245.1     | 7.8      | 0.5                  | 600                   | d8-15-HETE     | 0.99           | BD          | 91        |
| 19-hydroxy-5Z,8Z,11Z,14Z-eicosatetraenoic acid          | 19-HETE                 | 319.2     | 231.1     | 7.68     | 0.5                  | 600                   | d8-15-HETE     | 0.987          | BD          | 399       |
| 15-hydroxy-5Z,8Z,11Z,13E-eicosatetraenoic acid          | 15-HETE                 | 319.2     | 219.1     | 8.87     | 0.1                  | 120                   | d8-15-HETE     | 0.996          | 37900       | 1494      |
| 12-hydroxy-5Z,8Z,10E,14Z-eicosatetraenoic acid          | 12-HETE                 | 319.2     | 179.2     | 9.47     | 1.25                 | 1500                  | d8-15-HETE     | 0.973          | 6710        | 4105      |
| 11-hydroxy-5E,8Z,12Z,14Z-eicosatetraenoic acid          | 11-HETE                 | 319.2     | 167.2     | 9.22     | 0.1                  | 120                   | d8-15-HETE     | 0.998          | 4269        | 1744      |
| 8-hydroxy-5Z,9E,11Z,14Z-eicosatetraenoic acid           | 8-HETE                  | 319.2     | 163.3     | 9.47     | 0.1                  | 120                   | d8-15-HETE     | 9.63           | 407         | 167       |
| 5S-hydroxy-6E,8Z,11Z,14Z-eicosatetraenoic acid          | 5-HETE                  | 319.2     | 257.3     | 9.47     | 0.1                  | 120                   | d8-15-HETE     | 0.997          | 2236        | 1603      |
| Lipoxin A4                                              | Lipoxin_A4              | 351.2     | 115.1     | 4.43     | 0.025                | 30                    | d8-15-HETE     | 0.996          | 90          | 30        |
| Lipoxin B4                                              | Lipoxin_B4              | 351.2     | 221.1     | 3.96     | 0.025                | 30                    | d8-15-HETE     | 0.998          | 27          | BD        |
| Leukotriene B4                                          | LTB4                    | 335.2     | 195.3     | 6.11     | 0.025                | 30                    | d4-LTB4        | 0.998          | 38          | BD        |
| 20-carboxy arachidonic acid                             | 20-carboxy-AA           | 333.2     | 271.2     | 7.31     | 0.025                | 30                    | d4-LTB4        | 0.99           | 252         | 123       |
| Docosahexaenoic acid                                    | DHA                     | 327.2     | 283.2     | 12.69    | 15                   | 18000                 | AA-d8          | 0.989          | 46583       | 78500     |
| Eicosapentaenoic acid                                   | EPA                     | 301.2     | 257.2     | 12.28    | 15                   | 18000                 | AA-d8          | 0.979          | 41750       | 121800    |
| Linoleic acid                                           | LA                      | 279.2     | 261.2     | 12.86    | 15                   | 18000                 | AA-d8          | 0.981          | 21900       | 124900    |
| Arachidonic acid                                        | AA                      | 303.2     | 259.2     | 12.8     | 15                   | 18000                 | AA-d8          | 0.978          | 103800      | 114900    |
| Prostaglandin E2-d9                                     | PGE2-d9                 | 360.2     | 280.1     | 3.72     |                      |                       |                |                |             |           |
| 11,12-epoxy-5Z,8Z,14Z-eicosatrienoic acid-d11           | 11,12-EET-d11           | 330.2     | 179.2     | 10.9     |                      |                       |                |                |             |           |
| 11,12-dihydroxy-5Z,8Z,14Z-eicosatrienoic acid-d11       | 11,12-DHET-d11          | 348.3     | 167.1     | 7.02     |                      |                       |                |                |             |           |
| 15-hydroxyeicosatetraenoic acid-d8                      | d8-15-HETE              | 327.2     | 226.1     | 8.77     |                      |                       |                |                |             |           |
| d4-leukotriene B4                                       | d4-LTB4                 | 339.2     | 197.1     | 6.08     |                      |                       |                |                |             |           |
| Arachidonic acid-d8                                     | AA-d8                   | 311.2     | 267.2     | 12.79    |                      |                       |                |                |             |           |

**Supplementary Table 2. Reference standards and internal standards used to assess oxylipin concentrations.** Ionization masses (MS1 and MS2) in mass/charge ratio (m/z), retention time (RT), the minimum/maximum concentrations used in the standard curve (pg/ul injected) and reference internal standard are indicated. Analyte quantification was determined using standard curves determined based on indicated ISTDs. r<sup>2</sup> values of the derived standard curves are shown. Average signal to noise (S/N) ratios for adipose tissue and liver (free) are also shown.
