# Supplementary material for: Multi-tissue profiling of oxylipins reveal a conserved up-regulation of epoxide:diol ratio that associates with white adipose tissue inflammation and liver steatosis in obesity
Source: PubMed Central journal article supplement (PMC11061246; doi:10.1016/j.ebiom.2024.105127), 2024-04-26
Supplement: mmc13.pdf [file mmc13.pdf]

| oxylipin      | WAT              |              | Plasma             |              | oxylipin           | WAT           |              | Plasma        |              |
|---------------|------------------|--------------|--------------------|--------------|--------------------|---------------|--------------|---------------|--------------|
|               | p-value          | FDR          | p-value            | FDR          |                    | p-value       | FDR          | p-value       | FDR          |
| 20-carboxy-AA | 0.77             | 0.87         | 0.09               | 0.15         | 5-HETE             | 0.66          | 0.82         | 0.51          | 0.57         |
| AA            | 0.81             | 0.90         | 0.14               | 0.22         | 8-HETE             | 0.43          | 0.71         | 0.81          | 0.83         |
| DHA           | 0.74             | 0.86         | 0.17               | 0.26         | 11-HETE            | 0.58          | 0.78         | 0.93          | 0.93         |
| EPA           | 0.93             | 0.97         | 0.62               | 0.66         | 12-HETE            | 0.51          | 0.74         | <b>0.008*</b> | <b>0.037</b> |
| Linoleic acid | 0.31             | 0.56         | <b>0.015*</b>      | <b>0.055</b> | 15-HETE            | 0.28          | 0.53         | 0.051         | 0.10         |
| 10,11-EpDPA   | 0.54             | 0.74         | <b>0.0015*</b>     | <b>0.020</b> | 19-HETE            | n.d.          | n.d.         | 0.50          | 0.57         |
| 13,14-EpDPA   | 0.52             | 0.74         | n.d.               | n.d.         | 20-HETE            | n.d.          | n.d.         | <b>0.045*</b> | <b>0.10</b>  |
| 16,17-EpDPA   | 0.12             | 0.29         | n.d.               | n.d.         | Lipoxin_A4         | 0.12          | 0.29         | n.d.          | n.d.         |
| 19,20-EpDPE   | 0.06             | 0.22         | 0.287              | 0.38         | Lipoxin_B4         | 0.13          | 0.30         | n.d.          | n.d.         |
| 7,8-DiHDPA    | n.d.             | n.d.         | <b>0.004*</b>      | <b>0.023</b> | 9-HODE             | 0.10          | 0.28         | 0.49          | 0.57         |
| 10,11-DiHDPA  | <b>0.014*</b>    | <b>0.11</b>  | <b>0.049*</b>      | <b>0.10</b>  | 13-HODE            | <b>0.046*</b> | <b>0.21</b>  | 0.28          | 0.38         |
| 13,14-DiHDPA  | n.d.             | n.d.         | <b>0.004*</b>      | <b>0.023</b> | 17-HDHA            | 0.1           | 0.28         | 0.16          | 0.25         |
| 16,17-DiHDPA  | n.d.             | n.d.         | <b>0.014*</b>      | <b>0.055</b> | 22-HDoHE           | n.d.          | n.d.         | <b>0.015*</b> | <b>0.055</b> |
| 19,20-DiHDPA  | 0.39             | 0.69         | <b>0.001*</b>      | <b>0.017</b> | 18-HEPE            | n.d.          | n.d.         | 0.27          | 0.37         |
| 17,18-EpETE   | n.d.             | n.d.         | <b>0.019*</b>      | <b>0.057</b> | PGB2               | 0.14          | 0.31         | <b>0.008*</b> | <b>0.037</b> |
| 18-HEPE       | 0.46             | 0.73         | n.d.               | n.d.         | PGD2               | 0.74          | 0.86         | 0.017         | 0.057        |
| 11,12-DiHETE  | n.d.             | n.d.         | <b>0.043*</b>      | <b>0.10</b>  | PGE2               | 0.86          | 0.93         | <b>0.001*</b> | <b>0.017</b> |
| 14,15-DiHETE  | 0.07             | 0.24         | 0.18               | 0.26         | 15ketoPGE2         | 0.60          | 0.78         | n.d.          | n.d.         |
| 17,18-DiHETE  | 0.15             | 0.32         | 0.08               | 0.14         | 6ketoPGF1a         | 0.89          | 0.95         | n.d.          | n.d.         |
| 8,9-EET       | 0.06             | 0.22         | <b>&lt;0.0001*</b> | <b>0.005</b> | PGF2a              | 0.95          | 0.97         | 0.22          | 0.31         |
| 11,12-EET     | 0.11             | 0.29         | 0.05               | 0.10         | 8isoPGF2a          | 0.54          | 0.74         | <b>0.021*</b> | <b>0.059</b> |
| 14,15-EET     | 0.61             | 0.78         | 0.55               | 0.60         | TXB2               | 0.51          | 0.74         | <b>0.002*</b> | <b>0.020</b> |
| 5,6-DHET      | <b>&lt;.001*</b> | <b>0.026</b> | <b>0.023*</b>      | <b>0.059</b> | 11-dehydro-TXB2    | 0.41          | 0.70         | n.d.          | n.d.         |
| 8,9-DHET      | <b>0.018*</b>    | <b>0.11</b>  | 0.07               | 0.13         | 10,11-EpDPA:DiHDPA | 0.22          | 0.43         | <b>0.003*</b> | <b>0.023</b> |
| 11,12-DHET    | <b>0.018*</b>    | <b>0.11</b>  | <b>0.004*</b>      | <b>0.023</b> | 19,20EpDPE:DiHDPA  | <b>0.047*</b> | <b>0.21</b>  | <b>0.047*</b> | <b>0.10</b>  |
| 14,15-DHET    | <b>0.013*</b>    | <b>0.11</b>  | 0.07               | 0.13         | 8,9-EET:DHET       | 1.00          | 1.00         | <b>0.022*</b> | <b>0.059</b> |
| 9,10-EpOME    | 0.18             | 0.37         | 0.34               | 0.41         | 11,12-EET:DHET     | 0.74          | 0.86         | 0.34          | 0.41         |
| 12,13-EpOME   | <b>0.046*</b>    | <b>0.21</b>  | 0.42               | 0.50         | 14,15-EET:DHET     | 0.09          | 0.28         | 0.81          | 0.83         |
| 9,10-DHOME    | <b>&lt;.001*</b> | <b>0.026</b> | 0.08               | 0.14         | 9,10-EpOME:DiHOME  | <b>0.006*</b> | <b>0.077</b> | 0.333         | 0.41         |
| 12,13-DHOME   | <b>0.002*</b>    | <b>0.034</b> | n.d.               | n.d.         | 12,13-EpOME:DiHOME | <b>0.026*</b> | <b>0.15</b>  | <b>0.019*</b> | <b>0.057</b> |

**Supplementary Table 3. WAT and plasma oxylipin quantification.** Oxylipins were quantified in control (N=7), obese (N=52) and obese with T2DM patients (N=26). All significant metabolites decreased while epoxide:diol ratios increased with obesity and T2DM, except for 10,11-EpDPA:DiHDPA. Statistical significance was tested between the three groups using Kruskal-Wallis test; False Discovery Rate (FDR) calculated using Benjamini-Hochberg; n.d., not detected.
