# Supplementary material for: Multi-tissue profiling of oxylipins reveal a conserved up-regulation of epoxide:diol ratio that associates with white adipose tissue inflammation and liver steatosis in obesity
Source: PubMed Central journal article supplement (PMC11061246; doi:10.1016/j.ebiom.2024.105127), 2024-04-26
Supplement: mmc14.pdf [file mmc14.pdf]

## Certificate of Compliance

|                             |                                                                                                                                   |
|-----------------------------|-----------------------------------------------------------------------------------------------------------------------------------|
| <b>Product code</b>         | ab199720                                                                                                                          |
| <b>Lot number</b>           | GR3264378                                                                                                                         |
| <b>Product name</b>         | Anti-Collagen VI antibody [EPR17077] - C-terminal                                                                                 |
| <b>Description</b>          | Rabbit monoclonal [EPR17077] to Collagen VI - C-terminal                                                                          |
| <b>Specificity</b>          | Collagen VI                                                                                                                       |
| <b>Tested applications</b>  | <b>Suitable for:</b> IHC-P, WB                                                                                                    |
| <b>Species reactivity</b>   | <b>Reacts with:</b> Mouse, Rat, Human                                                                                             |
| <b>Immunogen</b>            | Recombinant fragment. This information is proprietary to Abcam and/or its suppliers.                                              |
| <b>Form</b>                 | Liquid                                                                                                                            |
| <b>Storage instructions</b> | Shipped at 4°C. Store at +4°C short term (1-2 weeks). Upon delivery aliquot. Store at -20°C long term. Avoid freeze / thaw cycle. |
| <b>Storage buffer</b>       | pH: 7.2<br>Preservative: 0.01% Sodium azide<br>Constituents: 59% PBS, 40% Glycerol (glycerin, glycerine), 0.05% BSA               |
| <b>Concentration</b>        | 0.951 mg/ml                                                                                                                       |
| <b>Purity</b>               | Protein A purified                                                                                                                |
| <b>Isotype</b>              | IgG                                                                                                                               |

**Abcam warrants that this product conforms to the information contained in this certificate.**

The product shelf life is 12 months from date of receipt.

All our products are covered for 12 months by our Abpromise guarantee.

For more information, please visit [www.abcam.com/abpromise](http://www.abcam.com/abpromise).

**Date Issued** 29 January 2024
