# Supplementary material for: Multi-tissue profiling of oxylipins reveal a conserved up-regulation of epoxide:diol ratio that associates with white adipose tissue inflammation and liver steatosis in obesity
Source: PubMed Central journal article supplement (PMC11061246; doi:10.1016/j.ebiom.2024.105127), 2024-04-26
Supplement: mmc20.pdf [file mmc20.pdf]

## Certificate of Analysis

This document certifies that this product has met all of the quality control standards defined by Cell Signaling Technology, Inc.

Product Number: # **2295**

Product Name: **C/EBP $\alpha$  Antibody**

Product Type: Antibody

Species of Origin: Rabbit Polyclonal

Lot number: #**4**

Concentration: **28 ug/ml**

Approved Applications: (Check those that apply)

- Western
- Immunoprecipitation
- Flow cytometry
- Immunohistochemistry
- Immunofluorescence
- Peptide ELISA
- Chromatin Immunoprecipitation (ChIP)
- Carrier-free Custom Formulation
- Other (specify): \_\_\_\_\_

Approval:

Production Lead: Kathryn Abell, Group Leader

Signature:  \_\_\_\_\_ Date: 17 NOV 2014

Supervisor: Valerie Goss Ph.D, Senior Group Leader

Signature:  \_\_\_\_\_ Date: 17 NOV 2014

Version 03.03.14
