# Supplementary material for: Multi-tissue profiling of oxylipins reveal a conserved up-regulation of epoxide:diol ratio that associates with white adipose tissue inflammation and liver steatosis in obesity
Source: PubMed Central journal article supplement (PMC11061246; doi:10.1016/j.ebiom.2024.105127), 2024-04-26
Supplement: mmc21.pdf [file mmc21.pdf]

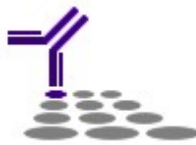

## CERTIFICATE OF ANALYSIS

|                           |                                |
|---------------------------|--------------------------------|
| <b>Cat. No.</b>           | 1310-01                        |
| <b>Lot No.</b>            | B2918-ZI20                     |
| <b>Description</b>        | Goat Anti-Type I Collagen-UNLB |
| <b>Clone</b>              | Polyclonal                     |
| <b>Concentration</b>      | 0.4 mg/mL                      |
| <b>Volume</b>             | 0.5 mL                         |
| <b>Expiration Date</b>    | March 2022                     |
| <b>Storage</b>            | 2-8°C                          |
| <b>Buffer Formulation</b> | Borate buffered saline, pH 8.2 |
| <b>Country of Origin</b>  | USA                            |

This document certifies that this product has met the quality control standards defined by SouthernBiotech and is guaranteed through the expiration date when stored undiluted as directed.

**Certified By**

*Lara Self*  
Quality Control

**Certified Date**

28Dec20

***For Research Use Only. Not for Diagnostic or Therapeutic Use.***
