# Supplementary material for: Multi-tissue profiling of oxylipins reveal a conserved up-regulation of epoxide:diol ratio that associates with white adipose tissue inflammation and liver steatosis in obesity
Source: PubMed Central journal article supplement (PMC11061246; doi:10.1016/j.ebiom.2024.105127), 2024-04-26
Supplement: mmc22.pdf [file mmc22.pdf]

## Certificate of Analysis

This document certifies that this product has met all of the quality control standards defined by Cell Signaling Technology, Inc.

**Research Use Only Reagent (RUO): For research use only. Not for use in diagnostic procedures.**

Product Number: **2435**  
Product Name: **PPAR $\gamma$  (C26H12) Rabbit mAb**

Product Type: Monoclonal Antibody  
Species of Origin: Rabbit  
Lot Number: 7  
Concentration: 125  $\mu$ g/ml

### Approved Applications:

- Chromatin IP
- Chromatin IP-seq
- Immunofluorescence (Immunocytochemistry)
- Immunohistochemistry (Paraffin)
- Western Blotting

Approval:

Production: Valerie Goss

Date: 01-March-2021
